# Supplementary material for: Influence of hydrodynamic mixing on the distribution of dissolved organic carbon in the East China Sea and the northwest Pacific
Source: Copernicus journal article supplement (doi:10.5194/os-2018-78), 2018-09-10
Supplement: Supplementary file 1 [file os-2018-78-supplement.pdf]

## Supporting information

**Table S1** Sampling site location, depth, hydrodynamic data, DOC/DIC concentrations and  $\Delta^{14}\text{C}$ -DIC values

| Station           | Lat.<br>(°N) | Lon.<br>(°E) | Depth<br>(m) | Temp.<br>(°C) | Salinity | DOC<br>( $\mu\text{M}$ ) | DIC<br>( $\mu\text{mol kg}^{-1}$ ) | $\Delta^{14}\text{C}$ -<br>DIC (‰) | AOU<br>( $\mu\text{M}$ ) |
|-------------------|--------------|--------------|--------------|---------------|----------|--------------------------|------------------------------------|------------------------------------|--------------------------|
| <b><i>ECS</i></b> |              |              |              |               |          |                          |                                    |                                    |                          |
| <b>Stn.1</b>      | 28.37        | 126.69       | 5            | 27.5          | 33.96    | 78                       | 1805                               | 12                                 | 13                       |
|                   |              |              | 30           | 26.1          | 34.19    | 82                       | 1804                               | 21                                 | 20                       |
|                   |              |              | 50           | 23.4          | 34.60    | 88                       | 1909                               | 30                                 | 41                       |
|                   |              |              | 100          | 18.9          | 34.65    | 74                       |                                    |                                    | 77                       |
|                   |              |              | 130          | 16.9          | 34.61    | 63                       |                                    |                                    | 86                       |
|                   |              |              | 140          | 14.1          | 34.48    | 69                       | 1923                               | 20                                 | 108                      |
|                   |              |              | 185          | 13.5          | 34.48    | 66                       | 1862                               | 6                                  | 111                      |
| <b>Stn.7</b>      | 28.30        | 126.83       | 5            | 27.4          | 33.88    | 79                       | 1799                               | 31                                 | 12                       |
|                   |              |              | 40           | 26.3          | 34.10    | 78                       | 1826                               | 36                                 | 18                       |
|                   |              |              | 80           | 22.0          | 34.58    | 64                       | 1888                               | 43                                 | 52                       |
|                   |              |              | 120          | 20.0          | 34.66    | 66                       |                                    |                                    | 65                       |
|                   |              |              | 180          | 17.2          | 34.67    | 63                       | 1897                               | 30                                 | 75                       |
|                   |              |              | 256          | 14.6          | 34.54    | 61                       | 1933                               | 21                                 | 94                       |
| <b>Stn.11</b>     | 28.43        | 126.53       | 5            | 26.3          | 33.92    | 76                       | 1777                               | 31                                 | 12                       |
|                   |              |              | 20           | 25.5          | 33.95    | 76                       | 1821                               | 30                                 | 14                       |
|                   |              |              | 60           | 23.6          | 34.21    | 71                       | 1841                               | 30                                 | 31                       |
|                   |              |              | 80           | 19.4          | 34.60    | 64                       |                                    |                                    | 72                       |
|                   |              |              | 100          | 18.4          | 34.64    | 60                       | 1966                               | 4                                  | 81                       |
|                   |              |              | 120          | 17.8          | 34.64    | 61                       |                                    |                                    | 80                       |
|                   |              |              | 138          | 13.4          | 34.48    | 60                       | 2045                               | -42                                | 114                      |
| <b>Z1</b>         | 28.07        | 127.13       | 10           | 29.2          | 34.45    | 71                       | 1822                               | 44                                 | 13                       |
|                   |              |              | 25           | 28.0          | 34.55    | 84                       | 1828                               | 38                                 | 13                       |
|                   |              |              | 75           | 26.7          | 34.67    | 77                       | 1793                               | 34                                 | 17                       |
|                   |              |              | 150          | 22.0          | 34.82    | 72                       | 1812                               | 32                                 | 42                       |
|                   |              |              | 200          | 19.2          | 34.77    | 62                       | 1889                               | 25                                 | 60                       |
|                   |              |              | 400          | 11.6          | 34.36    | 52                       | 1894                               | 19                                 | 126                      |
|                   |              |              | 450          | 10.3          | 34.31    | 56                       |                                    |                                    | 145                      |
|                   |              |              | 700          | 6.0           | 34.32    | 47                       | 2102                               | -102                               | 225                      |
|                   |              |              | 800          | 5.2           | 34.35    | 47                       | 2098                               | -131                               | 239                      |
| <b>Z2</b>         | 27.93        | 127.36       | 10           | 29.3          | 34.48    | 81                       | 1749                               | 31                                 | 12                       |
|                   |              |              | 50           | 27.9          | 34.45    | 78                       | 1720                               | 34                                 | 14                       |
|                   |              |              | 90           | 24.2          | 34.82    | 72                       | 1801                               | 31                                 | 34                       |
|                   |              |              | 125          | 23.1          | 34.87    | 67                       | 1823                               | 43                                 | 45                       |
|                   |              |              | 200          | 19.7          | 34.78    | 63                       |                                    |                                    | 54                       |
|                   |              |              | 300          | 16.7          | 34.66    | 59                       | 1829                               | 48                                 | 67                       |
|                   |              |              | 500          | 10.2          | 34.32    | 59                       | 1942                               | -31                                | 148                      |

To be continued

| Station           | Lat.<br>(°N) | Lon.<br>(°E) | Depth<br>(m) | Temp.<br>(°C) | Salinity | DOC<br>(µM) | DIC<br>(µmol kg <sup>-1</sup> ) | Δ <sup>14</sup> C-<br>DIC (‰) | AOU<br>(µM) |
|-------------------|--------------|--------------|--------------|---------------|----------|-------------|---------------------------------|-------------------------------|-------------|
| <b>Z3</b>         | 27.75        | 126.63       | 600          | 8.0           | 34.30    | 55          | 2085                            | -86                           | 188         |
|                   |              |              | 800          | 5.3           | 34.34    | 52          | 2111                            | -149                          | 238         |
|                   |              |              | 1000         | 4.3           | 34.39    | 54          | 2142                            | -188                          | 255         |
|                   |              |              | 1295         | 3.9           | 34.42    | 47          | 2086                            | -205                          | 261         |
|                   |              |              | 10           | 28.8          | 34.02    | 72          |                                 |                               | 12          |
|                   |              |              | 60           | 24.4          | 34.53    | 68          |                                 |                               | 31          |
|                   |              |              | 150          | 19.2          | 34.76    | 59          |                                 |                               | 65          |
|                   |              |              | 300          | 14.5          | 34.53    | 54          |                                 |                               | 100         |
|                   |              |              | 500          | 7.7           | 34.30    | 52          |                                 |                               | 193         |
|                   |              |              | 700          | 5.8           | 34.33    | 47          |                                 |                               | 229         |
|                   |              |              | 900          | 4.6           | 34.38    | 50          |                                 |                               | 249         |
|                   |              |              | 1100         | 4.1           | 34.41    | 48          |                                 |                               | 258         |
|                   |              |              | 1300         | 3.8           | 34.42    | 49          |                                 |                               | 261         |
|                   |              |              | 1400         | 3.8           | 34.42    | 47          |                                 |                               | 262         |
| <b>Z4</b>         | 28.63        | 127.00       | 5            | 28.0          | 34.12    | 78          | 1760                            | 21                            | 13          |
|                   |              |              | 60           | 25.1          | 34.64    | 75          | 1766                            | 5                             | 20          |
|                   |              |              | 120          | 20.0          | 34.69    | 61          | 1971                            | 2                             | 62          |
|                   |              |              | 150          | 18.2          | 34.67    | 55          |                                 |                               | 71          |
|                   |              |              | 180          | 15.8          | 34.59    | 62          |                                 |                               | 89          |
|                   |              |              | 240          | 12.6          | 34.44    | 65          | 1962                            | -10                           | 122         |
|                   |              |              | 300          | 10.3          | 34.34    | 56          | 2008                            | -13                           | 147         |
|                   |              |              | 413          | 8.9           | 34.30    | 57          | 2034                            | -56                           | 174         |
| <b><u>NWP</u></b> |              |              |              |               |          |             |                                 |                               |             |
| <b>K2</b>         | 25.10        | 134.02       | 5            | 24.4          | 34.98    | 65          | 1848                            | 45                            |             |
|                   |              |              | 85           | 20.4          | 34.91    | 61          |                                 |                               |             |
|                   |              |              | 100          | 20.3          | 34.90    | 59          | 1867                            | 49                            |             |
|                   |              |              | 150          | 19.2          | 34.84    | 59          |                                 |                               |             |
|                   |              |              | 300          | 16.5          | 34.67    | 52          | 1918                            | 56                            |             |
|                   |              |              | 500          | 10.9          | 34.30    | 47          | 1867                            | 38                            |             |
|                   |              |              | 650          | 6.8           | 34.15    | 44          | 2056                            | -64                           |             |
|                   |              |              | 1000         | 3.9           | 34.37    | 41          | 2110                            | -180                          |             |
| <b>A4</b>         | 34.00        | 147.80       | 5            | 17.5          | 34.76    | 53          | 1822                            | 51                            |             |
|                   |              |              | 50           | 17.2          | 34.76    | 39          | 1806                            | 45                            |             |
|                   |              |              | 100          | 17.0          | 34.77    | 38          | 1824                            | 49                            |             |
|                   |              |              | 200          | 16.9          | 34.75    | 42          | 1836                            | 45                            |             |
|                   |              |              | 500          | 14.2          | 34.51    | 38          | 2088                            | -233                          |             |
|                   |              |              | 750          | 7.8           | 34.11    | 39          | 2087                            | -231                          |             |
|                   |              |              | 1000         | 4.8           | 34.15    | 44          | 2063                            | -229                          |             |
|                   |              |              | 2000         | 2.2           | 34.55    | 44          | 1975                            | -226                          |             |
| <b>A6</b>         | 34.02        | 150.04       | 3000         | 1.6           | 34.66    | 36          | 2120                            | -233                          |             |
|                   |              |              | 4000         | 1.5           | 34.68    | 37          | 2119                            | -220                          |             |
|                   |              |              | 5            | 17.7          | 34.76    | 54          |                                 |                               |             |
|                   |              |              | 63           | 17.5          | 34.76    | 55          |                                 |                               |             |
|                   |              |              | 100          | 17.3          | 34.76    | 56          |                                 |                               |             |
|                   |              |              | 200          | 16.9          | 34.75    | 53          |                                 |                               |             |

To be continued

| Station     | Lat.<br>(°N) | Lon.<br>(°E) | Depth<br>(m) | Temp.<br>(°C) | Salinity | DOC<br>(μM) | DIC<br>(μmol kg <sup>-1</sup> ) | Δ <sup>14</sup> C-<br>DIC (‰) | AOU<br>(μM) |
|-------------|--------------|--------------|--------------|---------------|----------|-------------|---------------------------------|-------------------------------|-------------|
|             |              |              | 500          | 13.3          | 34.45    | 46          |                                 |                               |             |
|             |              |              | 750          | 6.1           | 34.03    | 40          |                                 |                               |             |
|             |              |              | 1000         | 4.3           | 34.25    | 39          |                                 |                               |             |
|             |              |              | 2000         | 2.1           | 34.57    | 39          |                                 |                               |             |
|             |              |              | 3000         | 1.6           | 34.66    | 38          |                                 |                               |             |
|             |              |              | 3940         | 1.5           | 34.68    | 36          |                                 |                               |             |
| <b>A8</b>   | 34.04        | 152.02       | 5            | 17.7          | 34.79    | 63          | 1798                            | 48                            |             |
|             |              |              | 60           | 17.1          | 34.78    | 62          | 1834                            | 50                            |             |
|             |              |              | 100          | 16.9          | 34.76    | 63          | 1855                            | 41                            |             |
|             |              |              | 250          | 16.8          | 34.74    | 54          | 1850                            | 47                            |             |
|             |              |              | 500          | 12.6          | 34.40    | 54          | 1887                            | 22                            |             |
|             |              |              | 650          | 8.9           | 34.09    | 55          | 1876                            | 30                            |             |
|             |              |              | 1000         | 4.3           | 34.20    | 44          | 2056                            | -137                          |             |
|             |              |              | 2000         | 2.2           | 34.56    | 43          | 2112                            | -230                          |             |
|             |              |              | 3000         | 1.6           | 34.66    | 42          | 2141                            | -231                          |             |
|             |              |              | 3500         | 1.5           | 34.67    | 42          | 2138                            | -222                          |             |
| <b>B2</b>   | 37.00        | 147.00       | 5            | 14.7          | 34.49    | 43          | 1850                            | 31                            |             |
|             |              |              | 50           | 13.6          | 34.43    | 43          | 1875                            | 20                            |             |
|             |              |              | 100          | 11.2          | 34.32    | 42          | 1920                            | 1                             |             |
|             |              |              | 200          | 6.5           | 33.66    | 43          | 1926                            | -8                            |             |
|             |              |              | 350          | 5.5           | 33.90    | 36          | 2063                            | -125                          |             |
|             |              |              | 500          | 4.3           | 34.04    | 38          | 2067                            | -106                          |             |
|             |              |              | 750          | 3.7           | 34.29    | 36          | 2115                            | -166                          |             |
|             |              |              | 1000         | 3.0           | 34.41    | 35          | 2102                            | -234                          |             |
|             |              |              | 1500         | 2.3           | 34.53    | 37          | 2125                            | -226                          |             |
|             |              |              | 2000         | 1.9           | 34.60    | 36          | 2108                            | -219                          |             |
|             |              |              | 3000         | 1.6           | 34.67    | 37          | 2050                            | -220                          |             |
|             |              |              | 4000         | 1.5           | 34.69    | 37          | 2080                            | -228                          |             |
| <b>A1-b</b> | 32.63        | 145.95       | 5            | 18.3          | 34.77    | 57          |                                 |                               |             |
|             |              |              | 50           | 18.3          | 34.77    | 60          |                                 |                               |             |
|             |              |              | 100          | 17.2          | 34.76    | 57          |                                 |                               |             |
|             |              |              | 200          | 16.6          | 34.72    | 48          |                                 |                               |             |
|             |              |              | 500          | 9.8           | 34.22    | 39          |                                 |                               |             |
|             |              |              | 610          | 6.2           | 33.97    | 42          |                                 |                               |             |
|             |              |              | 1000         | 3.7           | 34.27    | 42          |                                 |                               |             |
|             |              |              | 1500         | 2.6           | 34.48    | 38          |                                 |                               |             |
|             |              |              | 1978         | 2.1           | 34.58    | 36          |                                 |                               |             |
| <b>B8</b>   | 30.97        | 146.99       | 5            | 19.4          | 34.88    | 63          | 1833                            | 49                            |             |
|             |              |              | 50           | 18.7          | 34.88    | 58          | 1829                            | 52                            |             |
|             |              |              | 100          | 18.4          | 34.86    | 60          | 1854                            | 50                            |             |
|             |              |              | 200          | 17.7          | 34.77    | 52          | 1854                            | 3                             |             |
|             |              |              | 500          | 11.8          | 34.33    | 53          | 1901                            | -99                           |             |
|             |              |              | 800          | 4.9           | 34.08    | 49          | 1893                            | -105                          |             |
|             |              |              | 1000         | 3.9           | 34.26    | 48          | 2073                            | -157                          |             |
|             |              |              | 2000         | 2.0           | 34.60    | 43          | 2008                            | -213                          |             |

To be continued

| Station   | Lat.<br>(°N) | Lon.<br>(°E) | Depth<br>(m) | Temp.<br>(°C) | Salinity | DOC<br>(μM) | DIC<br>(μmol kg <sup>-1</sup> ) | Δ <sup>14</sup> C-<br>DIC (‰) | AOU<br>(μM) |
|-----------|--------------|--------------|--------------|---------------|----------|-------------|---------------------------------|-------------------------------|-------------|
|           |              |              | 2500         | 1.7           | 34.64    | 41          | 1997                            | -219                          |             |
|           |              |              | 3000         | 1.6           | 34.66    | 42          | 2008                            | -212                          |             |
|           |              |              | 3500         | 1.5           | 34.67    | 42          | 2006                            | -212                          |             |
| <b>B9</b> | 29.86        | 146.53       | 5            | 20.7          | 34.89    | 57          | 1866                            | 42                            |             |
|           |              |              | 30           | 19.1          | 34.90    | 56          | 1858                            | 32                            |             |
|           |              |              | 55           | 18.3          | 34.85    | 54          |                                 |                               |             |
|           |              |              | 100          | 17.8          | 34.81    | 49          | 1870                            | 27                            |             |
|           |              |              | 150          | 17.6          | 34.80    | 43          | 1865                            | 26                            |             |
|           |              |              | 200          | 17.5          | 34.79    | 52          | 1858                            | 18                            |             |
|           |              |              | 300          | 17.1          | 34.75    | 52          | 1848                            | 31                            |             |
|           |              |              | 700          | 6.8           | 34.05    | 42          | 1961                            | -59                           |             |
|           |              |              | 800          | 5.3           | 34.07    | 37          |                                 |                               |             |
|           |              |              | 1000         | 3.9           | 34.28    | 37          | 2029                            | -159                          |             |
|           |              |              | 1200         | 3.2           | 34.40    | 38          |                                 |                               |             |
|           |              |              | 1500         | 2.5           | 34.51    | 36          | 2014                            | -220                          |             |
|           |              |              | 2000         | 2.0           | 34.60    | 36          | 2052                            | -222                          |             |
